# Supplementary material
Source: Springer Nature journal article supplement (https://www.springermedizin.de/resource/supplementary/13643_2013_182_MOESM1_ESM.pdf/9681810)
Supplement: MOESM1 [file 9681810]

## INSTRUCTIONS FOR COMPLETING THE COSMIN CHECKLIST

Mark the properties that have been assessed in the article

|                                                  |                          |
|--------------------------------------------------|--------------------------|
| A. Internal consistency                          | <input type="checkbox"/> |
| B. Reliability                                   | <input type="checkbox"/> |
| C. Measurement error                             | <input type="checkbox"/> |
| D. Content validity<br>(including face validity) | <input type="checkbox"/> |
| E. Structural validity                           | <input type="checkbox"/> |
| F. Hypotheses testing                            | <input type="checkbox"/> |
| G. Cross cultural validity                       | <input type="checkbox"/> |
| H. Criterion validity                            | <input type="checkbox"/> |
| I. Responsiveness                                | <input type="checkbox"/> |
| J. Interpretability                              | <input type="checkbox"/> |

Step 1

Are Item Response Theory (IRT) methods used in the article?

Yes

No

Complete IRT box

Step 2

Complete for each property you marked in step 1 the corresponding box A to J

Step 3

Complete for each property you marked in step 1 the Generalisability box

Step 4
